# Supplementary material
Source: Springer Nature journal article supplement (https://www.springermedizin.de/resource/supplementary/13041_2014_275_MOESM9_ESM.pdf/25657886)

**A**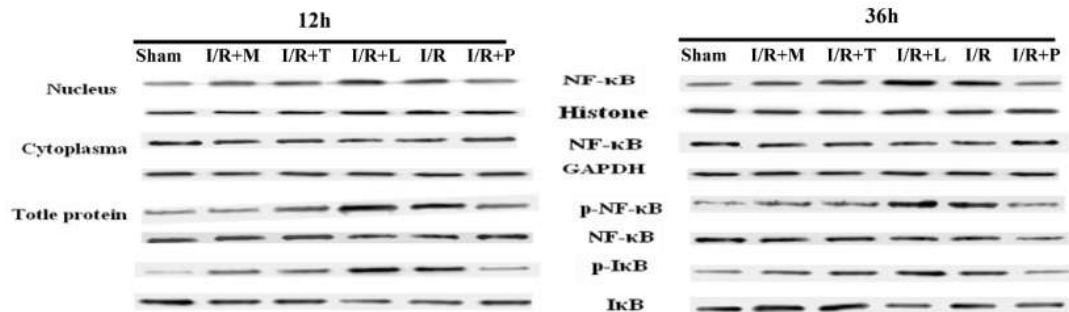**B**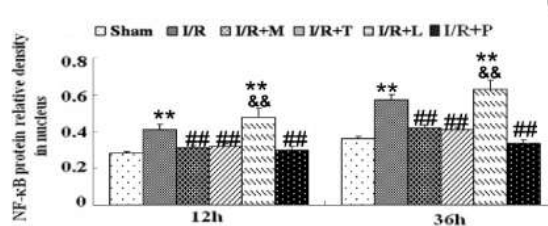**C**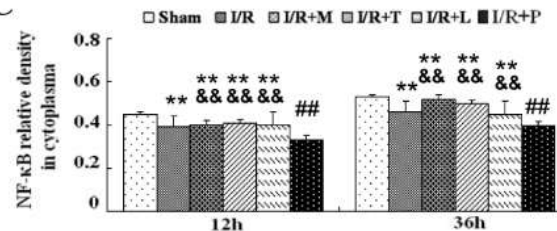**D**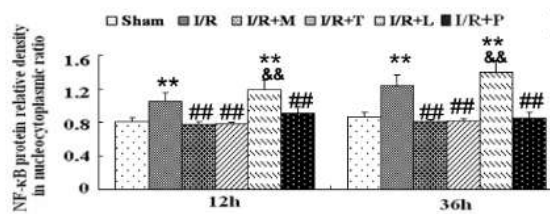**E**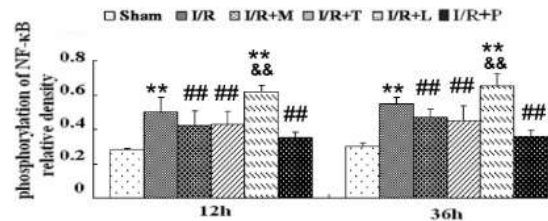**F**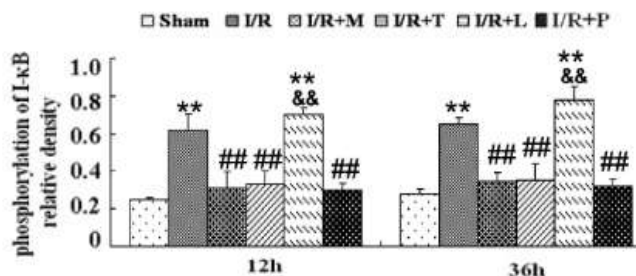

Supplement: MOESM9 [file 25657886]
